# Supplementary material
Source: PubMed Central journal article supplement (PMC4775902)
Supplement: SD10.pdf [file SD10.pdf]

SUPPLEMENTAL TABLE 1  
VAR2CSA recombinant proteins and *Plasmodium falciparum* strains used in the study

| Expression system | VAR2CSA domain      | Parasite strain | Accession no. | Construct boundaries | MW (kDa) |
|-------------------|---------------------|-----------------|---------------|----------------------|----------|
| PP*               | DBL1                | 7G8             | DQ408083      | 57-437               | 46       |
| PP                | DBL1                | 3D7             | XM_001350379  | 58-433               | 45       |
| BV/Sf9            | DBL1 + 2            | FCR3            | GU249598      | N9-A869              | 99       |
| BV/Sf9            | DBL2                | FCR3            | GU249598      | L538-G893            | 40       |
| PP                | DBL3                | 7G8             | DQ408083      | 1199-1587            | 45       |
| EC                | DBL3                | A4              | –             | –                    | –        |
| BV/Sf9            | DBL3                | FCR3            | GU249598      | T1210-A1587          | 43       |
| PP                | DBL4                | 7G8             | DQ408083      | 1604-1942            | 40       |
| BV/Sf9            | DBL4                | FCR3            | AY372123      | 1583-1947            | 43       |
| PP                | DBL4                | IT4             | –             | S1594-V1888          | 34.7     |
| PP                | DBL5                | 7G8             | DQ408083      | 2000-2318            | 39       |
| PP                | DBL5                | 3D7             | XM_001350379  | 1888-2291            | 48       |
| BV/Sf9            | DBL5                | FCR3            | AY372123      | 1990-2328            | 40       |
| BV/Sf9            | DBL6                | FCR3            | GU249598      | I2307-L2641          | 40       |
| BV/Sf9            | Full-length protein | FCR3            | GU249598      | M1-F2649             | 307      |

BV = baculovirus; DBL = Duffy antigen-binding ligand; EC = *Escherichia coli*; MW = molecular weight; PP = *Pichia pastoris*.  
\*Proteins expressed in *P. pastoris* have been described previously by Avril and others.<sup>32</sup>
